# Supplementary material
Source: Springer Nature journal article supplement (https://www.springermedizin.de/resource/supplementary/12963_2010_109_MOESM4_ESM.pdf/9572690)

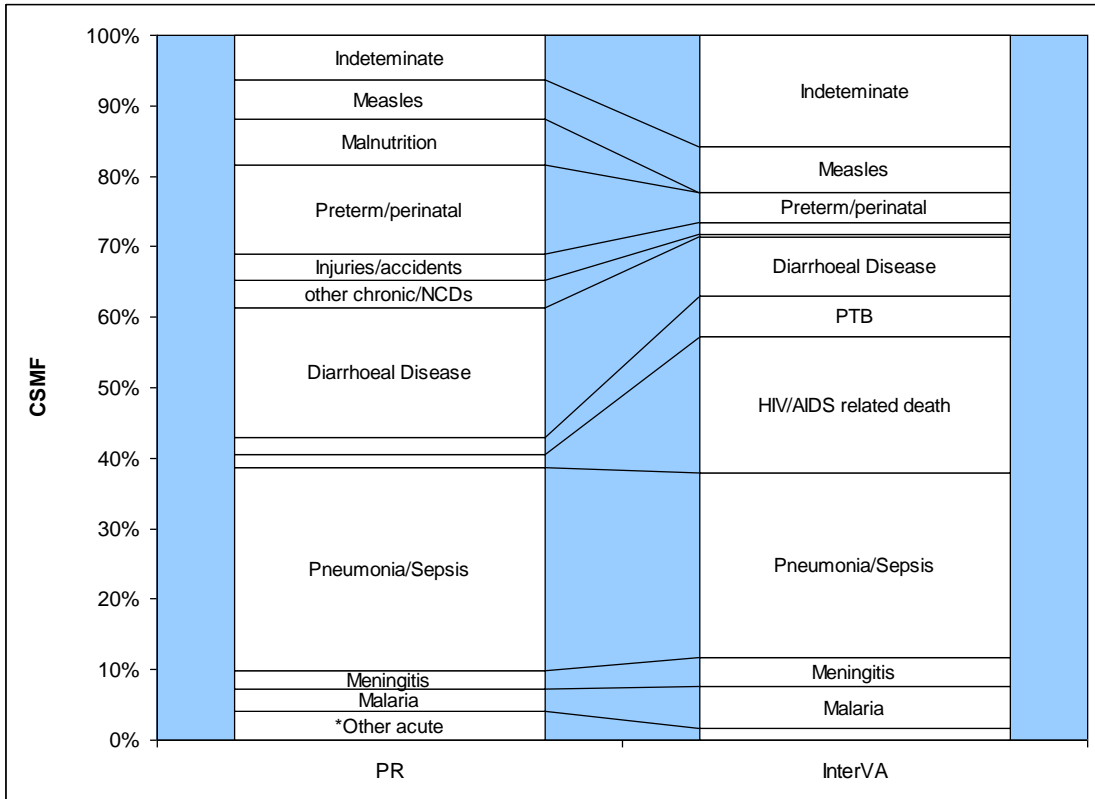

\*Other acute/infectious diseases. PTB, Pulmonary Tuberculosis.

Supplement: MOESM4 [file 9572690]
